# Supplementary material for: A Survey to Understand Parent/Caregiver and Children’s Views on Devices Used for the Administration of Oral Pediatric Medicines in Japan
Source: MDPI journal article supplement (doi:10.3390/children9020196), 2022-02-03
Supplement: s1 [file s1]

西暦 2021年04月19日

研究実施許可書

研究責任者 齊藤 順平 殿

国立成育医療研究センター 理事長  
五十嵐 隆

西暦2021年04月06日に貴殿から審査申請のあった研究を厳正に審査し、研究実施を許可します。

|       |                                                                                                                                                                                             |
|-------|---------------------------------------------------------------------------------------------------------------------------------------------------------------------------------------------|
| 受付番号  | 2021-008                                                                                                                                                                                    |
| 研究課題名 | 保護者および小学4年生以上の小児を対象とした、小児薬物療法に用いられる器具の使いやすさに関するアンケート調査～多施設・国際共同・前方視的・観察研究～                                                                                                                  |
| 審査事項  | <div>■研究等の実施の適否</div> <div>□研究等継続の適否</div> <div>    □重篤な有害事象</div> <div>    □研究に関する変更</div> <div>    □倫理的妥当性・科学的合理性を損なう事実報告</div> <div>    □研究の実施の適正性・研究結果の信頼を損なう事実報告</div> <div>□その他</div> |
| 判定    | <div>■承認    □条件付承認    □継続審査    □非該当    □不承認</div> <div>□研究継続    □条件付研究継続    □研究中止</div>                                                                                                     |
| 備考    | (条件付き承認の場合の研究実施許可条件)                                                                                                                                                                        |
